# Supplementary material for: Nano spinel cobaltites and their catalytic and electrochemical properties: facile synthesis of metal (Co, Ni, and Zn) and mixed metal (Co–Ni and Co–Zn) complexes of Schiff bases prepared from α-ketoglutaric acid and ethyl carbazate
Source: Royal Society of Chemistry journal article supplement (doi:10.1039/d0nj01016b), 2020-01-01
Supplement: d0nj01016b1.pdf [file d0nj01016b1.pdf]

## Electronic Supplementary Information

### Nano Spinel Cobaltites and Their Catalytic and Electrochemical Properties: Facile Synthesis of Metal (Co, Ni, and Zn) and Mixed Metal (Co-Ni and Co-Zn) Complexes of Schiff Bases Prepared from $\alpha$ -Ketoglutaric Acid and Ethyl Carbazate

Sheikdawood Parveen,<sup>a</sup> Hung Huy Nguyen,<sup>b</sup> Thathan Premkumar,<sup>\*c</sup> Horst Puschmann<sup>d</sup> and  
Subbiah Govindarajan<sup>\*a</sup>

**Table S1. Analytical data**

| Compound                                                  | Color<br>(% yield) | M.wt.<br>(g/mol) | Mol. Formula                                                                                       | % Found (Calcd.) |                |                  |                                  |
|-----------------------------------------------------------|--------------------|------------------|----------------------------------------------------------------------------------------------------|------------------|----------------|------------------|----------------------------------|
|                                                           |                    |                  |                                                                                                    | C                | H              | N                | M                                |
| <b>H<sub>2</sub>L.H<sub>2</sub>O</b>                      | White<br>(94)      | 250.21           | C <sub>8</sub> H <sub>14</sub> N <sub>2</sub> O <sub>7</sub>                                       | 38.80<br>(38.40) | 5.20<br>(5.63) | 11.40<br>(11.19) | -                                |
| <b>[Co(HL)<sub>2</sub>]</b>                               | Pink<br>(85)       | 521.30           | C <sub>16</sub> H <sub>22</sub> CoN <sub>4</sub> O <sub>12</sub>                                   | 37.21<br>(36.86) | 4.50<br>(4.25) | 10.98<br>(10.74) | 11.78 (11.30)                    |
| <b>[Ni(HL)<sub>2</sub>]</b>                               | Green<br>(89)      | 521.05           | C <sub>16</sub> H <sub>22</sub> NiN <sub>4</sub> O <sub>12</sub>                                   | 37.12<br>(36.88) | 4.71<br>(4.25) | 11.11<br>(10.75) | 11.89 (11.26)                    |
| <b>[Zn(HL)<sub>2</sub>]</b>                               | White<br>(88)      | 527.74           | C <sub>16</sub> H <sub>22</sub> ZnN <sub>4</sub> O <sub>12</sub>                                   | 36.85<br>(36.41) | 4.75<br>(4.20) | 10.87<br>(10.61) | 12.74 (12.38)                    |
| <b>[Ni<sub>1/3</sub>Co<sub>2/3</sub>(HL)<sub>2</sub>]</b> | Grey<br>(87)       | 521.23           | C <sub>16</sub> H <sub>22</sub> Ni <sub>1/3</sub> Co <sub>2/3</sub> N <sub>4</sub> O <sub>12</sub> | 37.21<br>(36.87) | 4.66<br>(4.22) | 10.95<br>(10.75) | 3.88 (3.75) Ni<br>7.00 (7.54) Co |
| <b>[Zn<sub>1/3</sub>Co<sub>2/3</sub>(HL)<sub>2</sub>]</b> | Light pink<br>(89) | 523.46           | C <sub>16</sub> H <sub>22</sub> Zn <sub>1/3</sub> Co <sub>2/3</sub> N <sub>4</sub> O <sub>12</sub> | 36.92<br>(36.70) | 4.56<br>(4.20) | 11.15<br>(10.70) | 4.00 (4.16) Zn<br>7.82 (7.51) Co |

**Table S2. FT-IR and UV-visible data**

| Compound                                                   | IR spectroscopic data (cm <sup>-1</sup> ) |                    |                    |                             |                            |                    | Electronic spectroscopic data<br>$\lambda_{\text{max}}(\text{nm}); (\epsilon[\text{M}^{-1}\text{cm}^{-1}])$ |
|------------------------------------------------------------|-------------------------------------------|--------------------|--------------------|-----------------------------|----------------------------|--------------------|-------------------------------------------------------------------------------------------------------------|
|                                                            | $\nu_{\text{O-H}}$                        | $\nu_{\text{N-H}}$ | $\nu_{\text{C=N}}$ | $\nu_{\text{C=O}}$<br>asym. | $\nu_{\text{C=O}}$<br>sym. | $\nu_{\text{N-N}}$ |                                                                                                             |
| <b>H<sub>2</sub>L.H<sub>2</sub>O</b>                       | 3456                                      | 3215               | 1663               | -                           | -                          | 1054               | 240 (25400); 293 (18900)                                                                                    |
| <b>[Co(HL)<sub>2</sub>]</b>                                | 3434                                      | 3209               | 1627               | 1542                        | 1375                       | 1048               | 241 (25900); 300(20200);<br>516 (350)                                                                       |
| <b>[Ni(HL)<sub>2</sub>]</b>                                | 3434                                      | 3210               | 1625               | 1544                        | 1375                       | 1050               | 239 (25300); 293 (19300);<br>388 (6000); 645 (250)                                                          |
| <b>[Zn(HL)<sub>2</sub>]</b>                                | 3456                                      | 3112               | 1661               | 1536                        | 1372                       | 1054               | 242 (24200); 294 (18200)                                                                                    |
| <b>[Ni<sub>1/3</sub>Co<sub>2/3</sub>(HL)<sub>2</sub>]</b>  | 3434                                      | 3095               | 1625               | 1542                        | 1375                       | 1050               | 240 (24300); 292 (19200);<br>384 (487); 521 (1800); 648 (160)                                               |
| <b>[Zn<sub>1/3</sub>Co<sub>2/3</sub> (HL)<sub>2</sub>]</b> | 3431                                      | 3098               | 1674               | 1539                        | 1376                       | 1049               | 242 (24200); 293 (18500);<br>506 (240)                                                                      |

**Table S3. Thermal data**

| Compounds                                                | DTA peak<br>temp (°C) | Thermogravimetry    |                           | Intermediates/End<br>products    |
|----------------------------------------------------------|-----------------------|---------------------|---------------------------|----------------------------------|
|                                                          |                       | Temp.<br>range (°C) | Mass Loss%<br>Obs. Calc'd |                                  |
| H <sub>2</sub> L.H <sub>2</sub> O                        | (+)104,(+)168         | 80-180              | 7.00 7.20                 | Melting, dehydration             |
|                                                          | (-)260                | 180-450             | 81.00 80.96               | CH <sub>3</sub> -CH=NH           |
|                                                          | (-)481                | 400-650             | 100.0 100.0               | Complete decomposition           |
| [Co(HL) <sub>2</sub> ]                                   | (+)255                | 200-350             | 60.00 60.68               | Cobalt propionate                |
|                                                          | (-)390                | 350-600             | 85.00 84.64               | Co <sub>3</sub> O <sub>4</sub>   |
| [Ni(HL) <sub>2</sub> ]                                   | (+)255                | 200-350             | 60.00 60.72               | Nickel propionate                |
|                                                          | (-)390                | 350-600             | 85.00 85.67               | NiO                              |
| [Zn(HL) <sub>2</sub> ]                                   | (+)250                | 200-350             | 60.00 59.95               | Zinc propionate                  |
|                                                          | (-)490                | 350-600             | 85.00 84.58               | ZnO                              |
| [Ni <sub>1/3</sub> Co <sub>2/3</sub> (HL) <sub>2</sub> ] | (+)260                | 200-350             | 60.00 6.83                | Mixed-metal propionate           |
|                                                          | (-)390                | 350-600             | 86.00 84.61               | NiCo <sub>2</sub> O <sub>4</sub> |
| [Zn <sub>1/3</sub> Co <sub>2/3</sub> (HL) <sub>2</sub> ] | (+)250                | 200-350             | 60.00 60.43               | Mixed-metal propionate           |
|                                                          | (-)455                | 350-600             | 85.00 84.25               | ZnCo <sub>2</sub> O <sub>4</sub> |

(+): endo; (-): exo

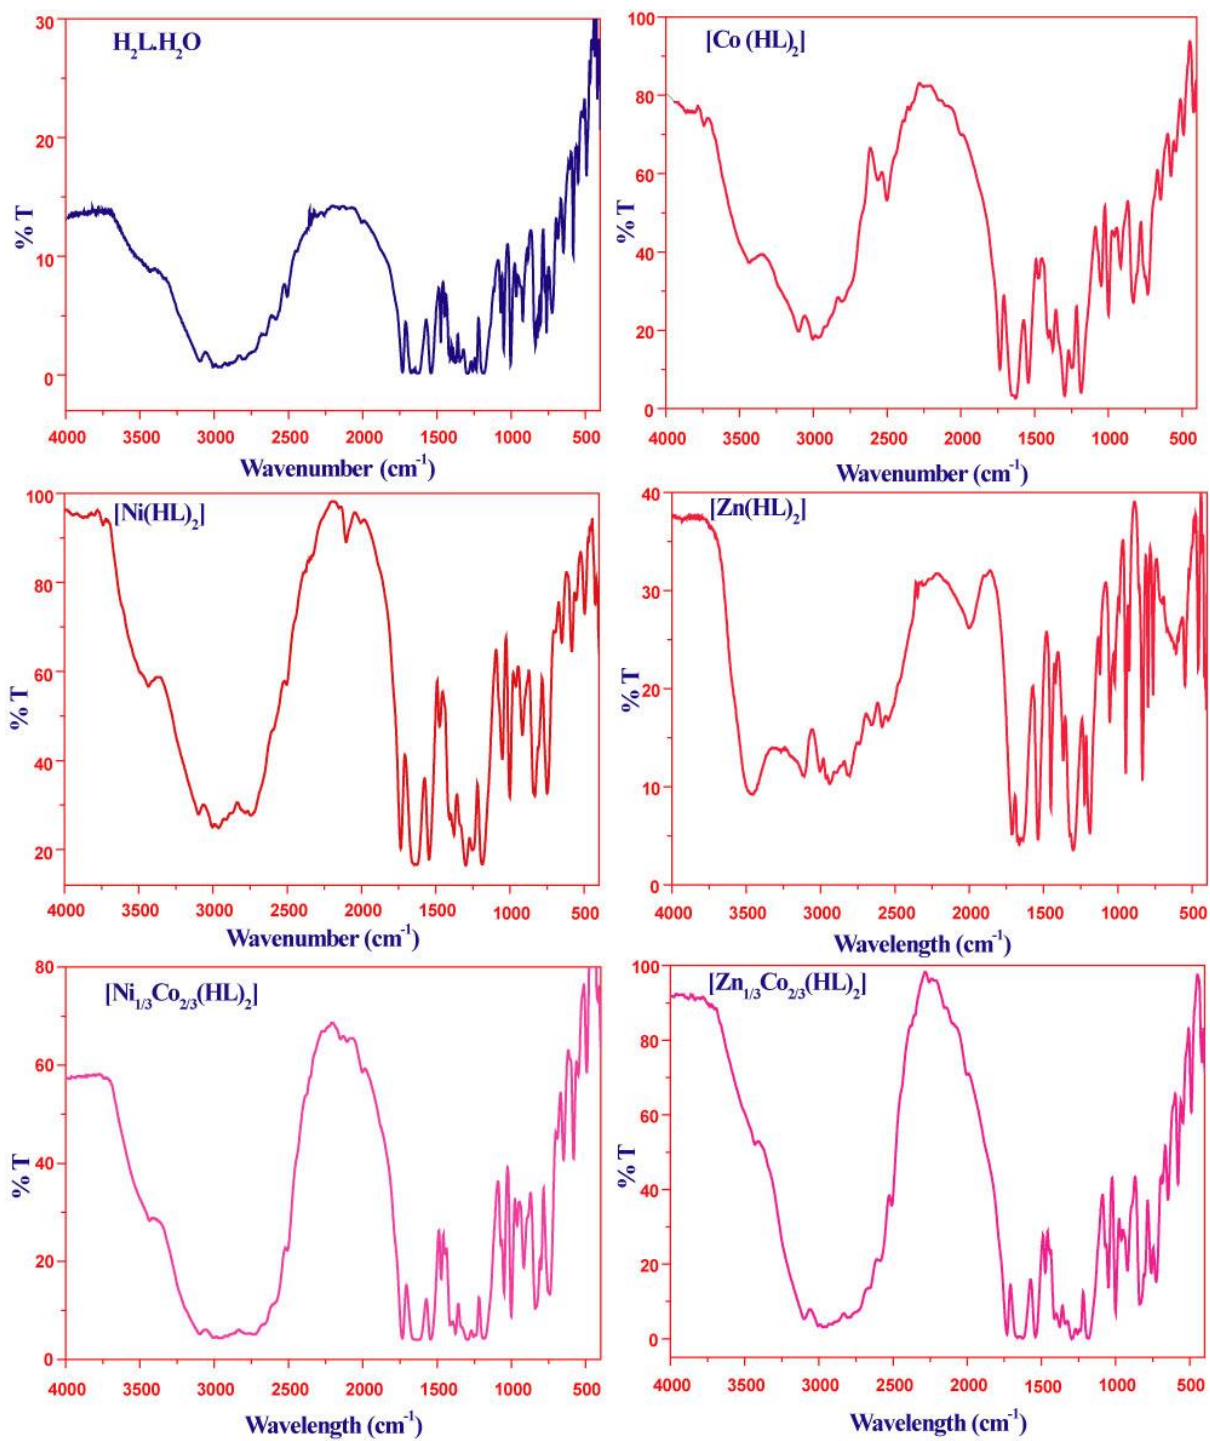

Fig. S1. FT-IR spectra of ligand and complexes.

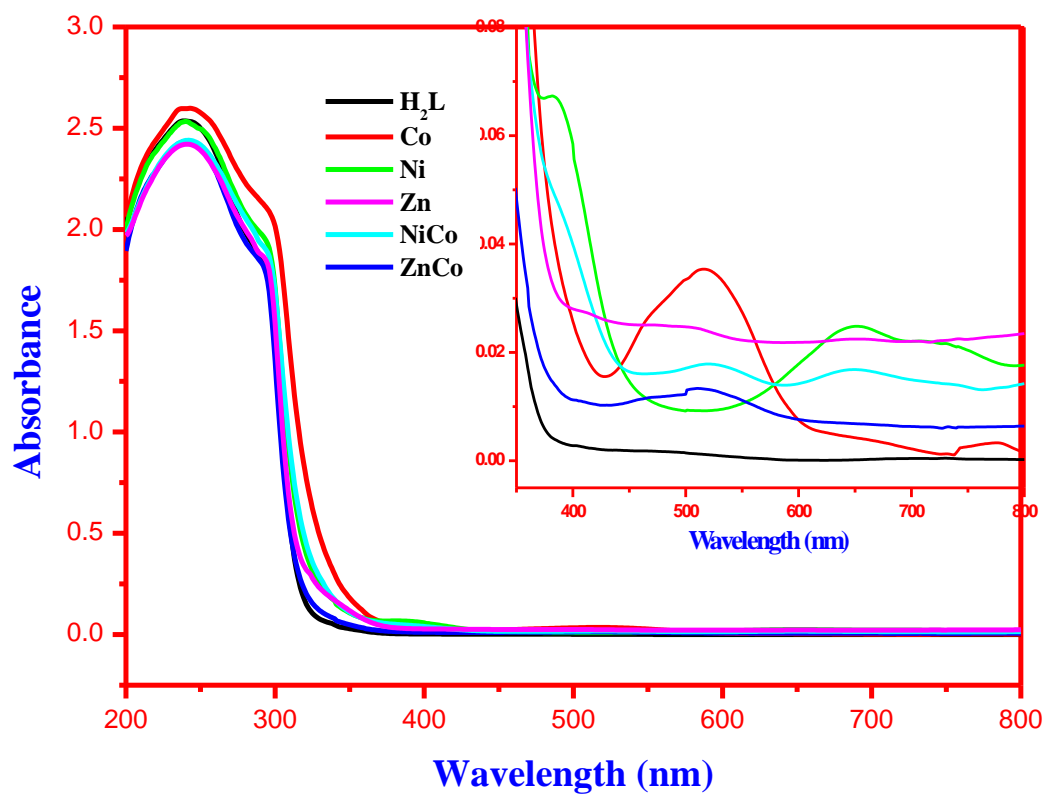

**Fig. S2.** UV-visible electronic absorption spectra for various ligands and complexes ( $10^{-3}$  M concentration).

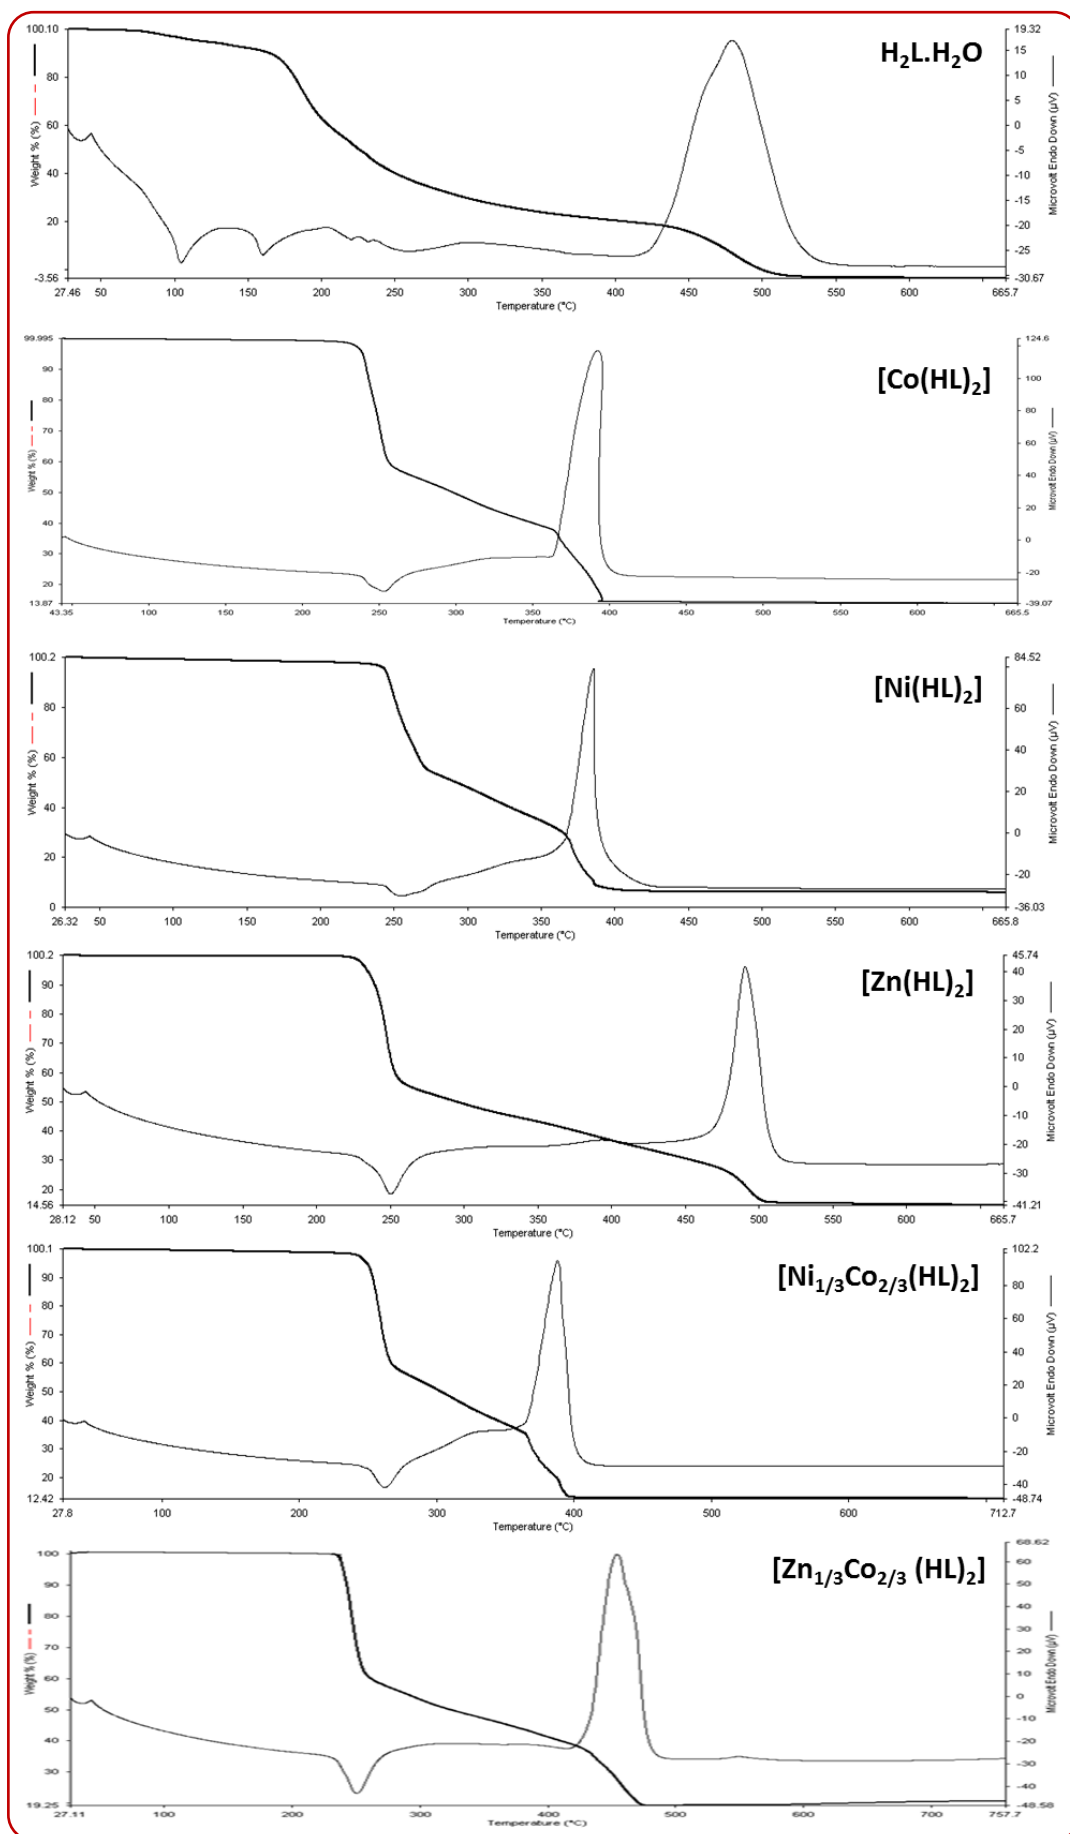

**Fig. S3.** Simultaneous TG-DTA of  $H_2L$  and complexes.

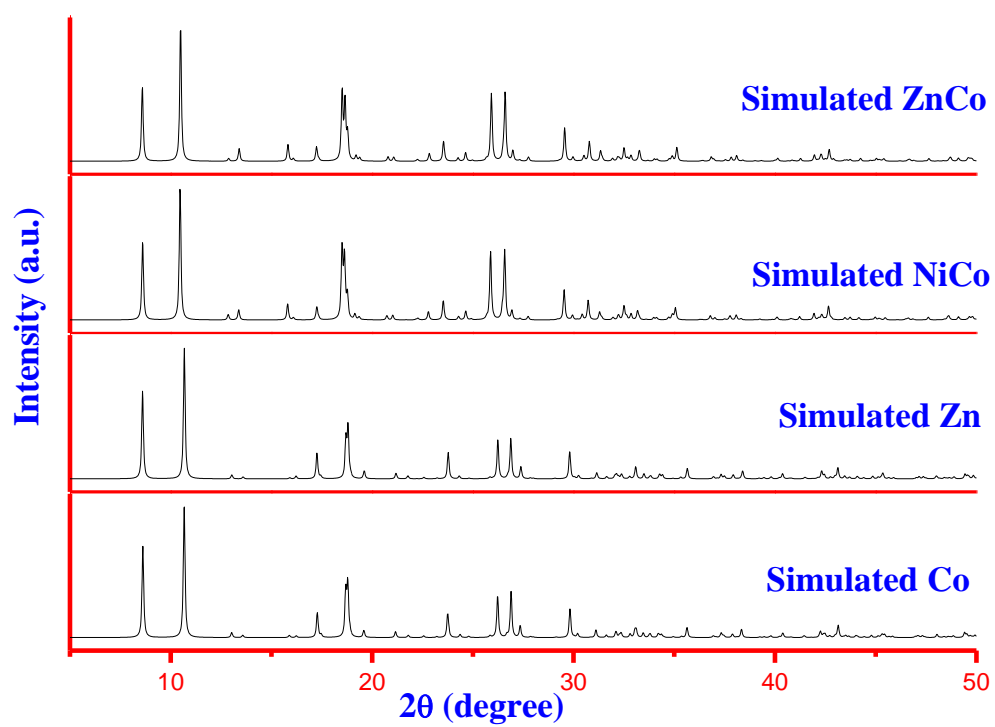

**Fig. S4.** PXRD patterns of the simulated single crystal crystallography data.

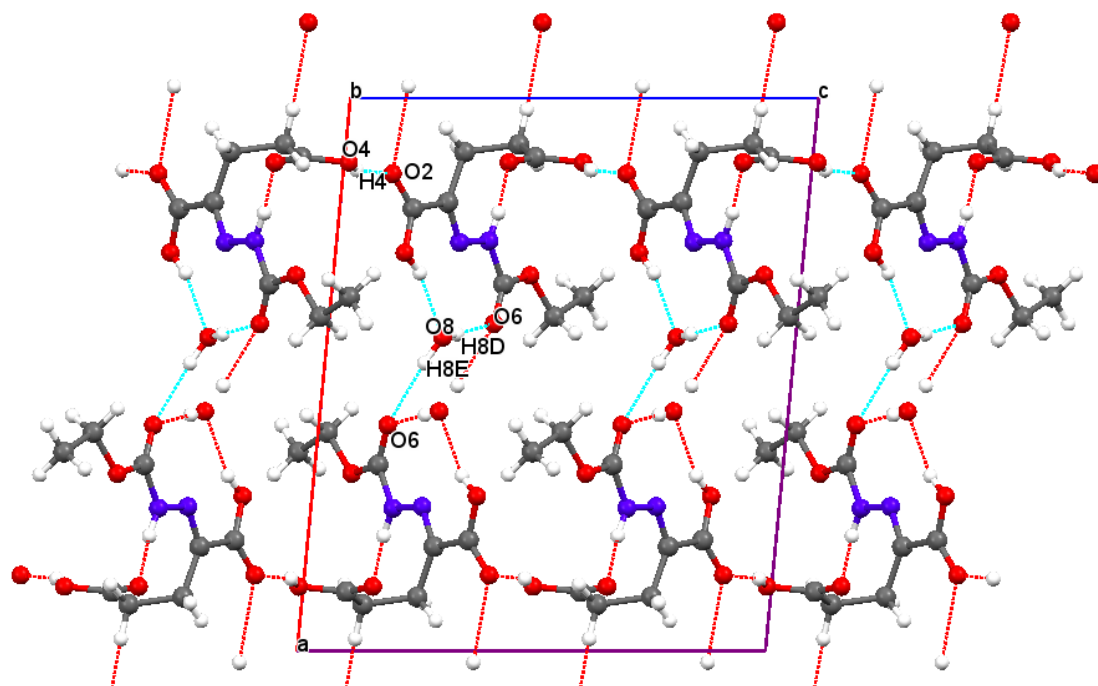

**Fig. S5.** Two dimensional structure of  $\text{H}_2\text{L}\cdot\text{H}_2\text{O}$ .

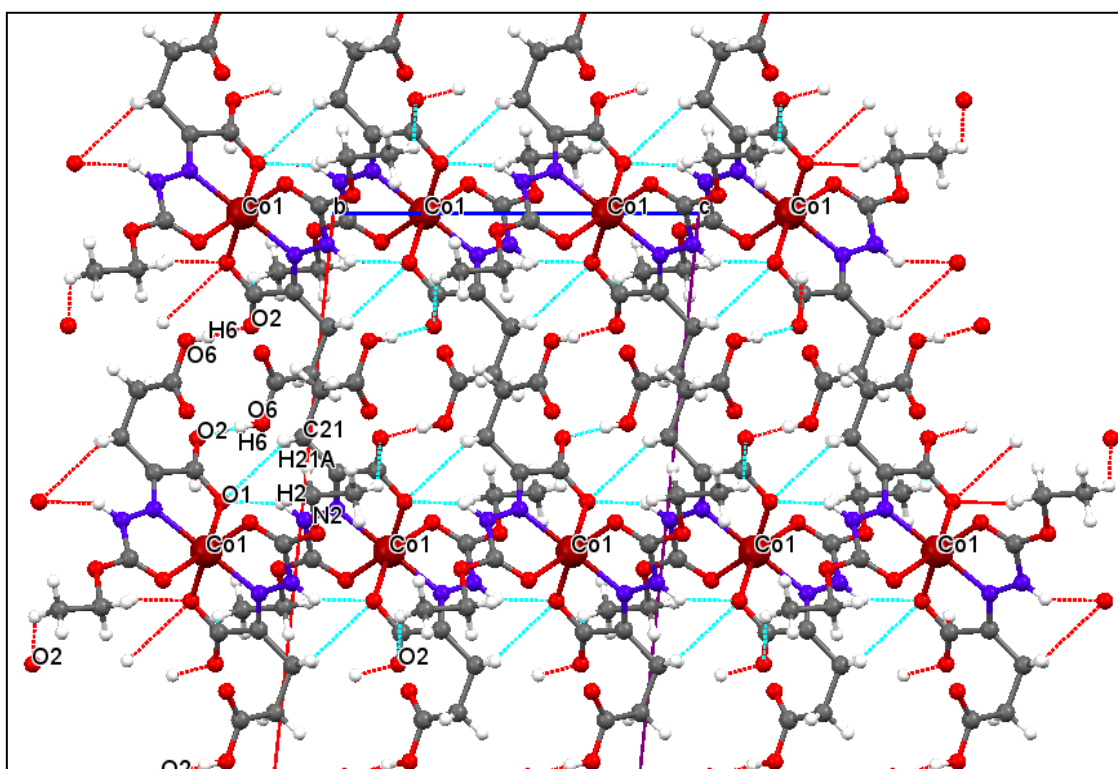

**Fig. S6.** 2D structure created by O-H...O, N-H...O and C-H...O hydrogen bonds in cobalt complex down the b-axis.

**Table S4. Hydrogen bonding data**

| <b>H<sub>2</sub>L. H<sub>2</sub>O</b>                       |                  |                       |                  |                          | <b>[Co(HL)<sub>2</sub>]</b>                                 |                  |                           |                  |                            |
|-------------------------------------------------------------|------------------|-----------------------|------------------|--------------------------|-------------------------------------------------------------|------------------|---------------------------|------------------|----------------------------|
| <b>D-H...A</b>                                              | <b>d(D-H)/ Å</b> | <b>d(A-H)/Å</b>       | <b>d(D-A)/ Å</b> | <b>D-H-A<sup>o</sup></b> | <b>D-H...A</b>                                              | <b>d(D-H) /Å</b> | <b>d(A-H)/ Å</b>          | <b>d(D-A)/ Å</b> | <b>D-H-A /<sup>o</sup></b> |
| N3-H3...O3 <sup>i</sup>                                     | 0.880            | 2.152                 | 2.968            | 154.10                   | N2-H2...O1 <sup>i</sup>                                     | 0.808            | 1.907                     | 2.666            | 135.06                     |
| O8-H8D...O6 <sup>ii</sup>                                   | 0.870            | 2.036                 | 2.904            | 176.00                   | C2-H21B...O1 <sup>i</sup>                                   | 0.990            | 2.672                     | 3.290            | 120.75                     |
| O8-H8E...O6 <sup>iii</sup>                                  | 0.870            | 2.026                 | 2.879            | 166.25                   | O6-H6...O2 <sup>ii</sup>                                    | 0.945            | 1.730                     | 2.671            | 174.06                     |
| C4-H44B...O2 <sup>iv</sup>                                  | 0.990            | 2.638                 | 3.612            | 167.6                    | C6-H6C...O2 <sup>iii</sup>                                  | 0.980            | 2.644                     | 3.371            | 131.11                     |
| O4-H4...O2 <sup>v</sup>                                     | 0.840            | 1.855                 | 2.661            | 160.21                   |                                                             |                  |                           |                  |                            |
| i. x, -1+y, z                                               |                  | iv. -x, -1/2+y, 1/2-z |                  |                          | i. x, 1-y, -1/2+z                                           |                  | iii. -x, 1-y, -1/2+z      |                  |                            |
| ii. x, y, z                                                 |                  | v. x, -1/2-y, -1/2+z  |                  |                          | ii. 1/2+x, -1/2+y, z                                        |                  |                           |                  |                            |
| iii. 1-x, 1/2+y, 1/2-z                                      |                  |                       |                  |                          |                                                             |                  |                           |                  |                            |
| <b>[Zn(HL)<sub>2</sub>]</b>                                 |                  |                       |                  |                          | <b>[Ni<sub>0.33</sub>Co<sub>0.67</sub>(HL)<sub>2</sub>]</b> |                  |                           |                  |                            |
| N2-H2...O2 <sup>i</sup>                                     | 0.870            | 1.906                 | 2.674            | 158.59                   | N2-H2...O1 <sup>i</sup>                                     | 0.860            | 2.008                     | 2.683            | 134.61                     |
| C6-H6B...O2 <sup>i</sup>                                    | 0.990            | 2.683                 | 3.305            | 121.09                   | C8-H8A...O2 <sup>ii</sup>                                   | 0.960            | 2.669                     | 3.407            | 133.98                     |
| O5-H5...O3 <sup>ii</sup>                                    | 0.840            | 1.838                 | 2.673            | 172.61                   | O3-H3...O2 <sup>iii</sup>                                   | 0.820            | 1.872                     | 2.683            | 171.19                     |
| C3-H3C...O3 <sup>iii</sup>                                  | 0.980            | 2.658                 | 3.373            | 130.07                   |                                                             |                  |                           |                  |                            |
| i. x, 1-y, -1/2+z                                           |                  | iii. 2-x, 1-y, 1-z    |                  |                          | i. x, 1-y, -1/2+z                                           |                  | iii. 1/2-x, -1/2+y, 1.5-z |                  |                            |
| ii. 1.5-x, -1/2+y, 1.5-z                                    |                  |                       |                  |                          | ii. 1-x, 1-y, 1-z                                           |                  |                           |                  |                            |
| <b>[Zn<sub>0.33</sub>Co<sub>0.67</sub>(HL)<sub>2</sub>]</b> |                  |                       |                  |                          |                                                             |                  |                           |                  |                            |
| N2-H2...O1 <sup>i</sup>                                     | 0.860            | 2.016                 | 2.694            | 135.07                   |                                                             |                  |                           |                  |                            |
| C3-H3B...O1 <sup>i</sup>                                    | 0.970            | 2.705                 | 3.312            | 121.18                   |                                                             |                  |                           |                  |                            |
| O3-H3...O2 <sup>ii</sup>                                    | 0.820            | 1.864                 | 2.679            | 172.06                   |                                                             |                  |                           |                  |                            |
| C8-H8C...O2 <sup>i</sup>                                    | 0.960            | 2.700                 | 3.400            | 130.23                   |                                                             |                  |                           |                  |                            |
| i. x, 1-y, -1/2+z                                           |                  | ii. -1/2+x, -1/2+y, z |                  |                          |                                                             |                  |                           |                  |                            |



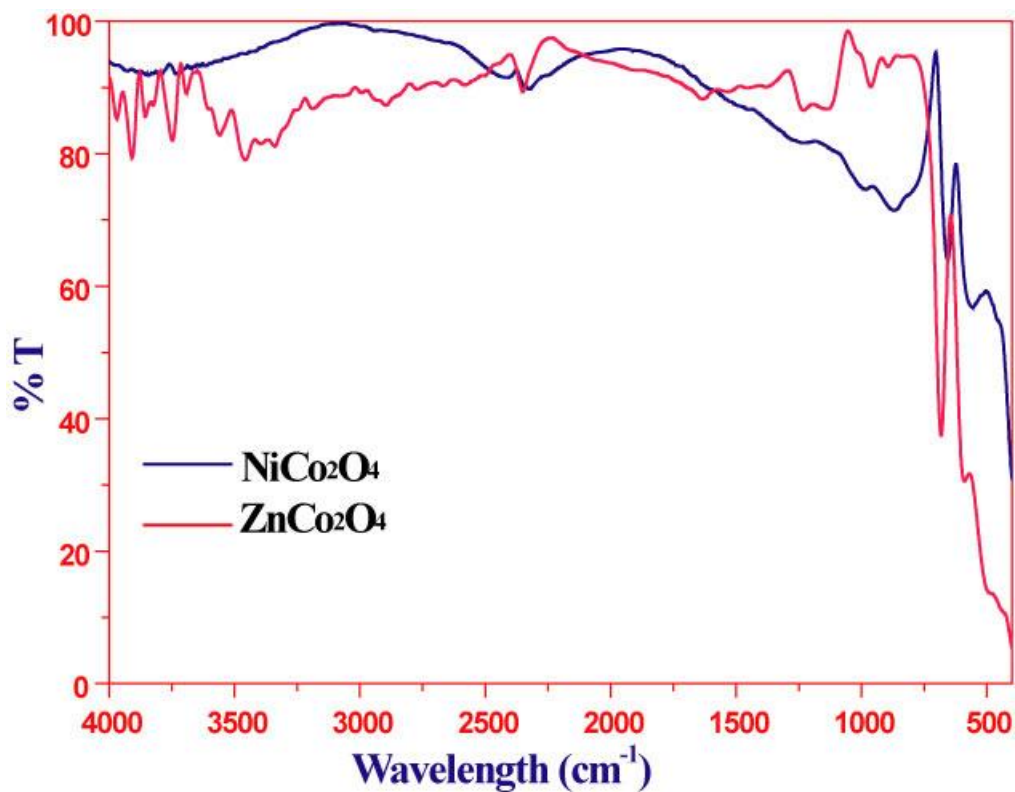

**Fig. S7.** FT-IR spectra of nanospinels.

## Experimental

### Synthesis of nanocrystalline NiCo<sub>2</sub>O<sub>4</sub> and ZnCo<sub>2</sub>O<sub>4</sub>

The oxide nanomaterials were obtained by heating the mixed metal complexes to 500 °C in a muffle furnace and calcining for 4 h. The samples were slowly heated at a rate of 5 °C/min in a silica crucible, followed by calcination for about 4 h to attain homogeneity.

### Materials and methods

All reagents and chemicals were of analytical reagent grade and were used without further purification. Double distilled water was used as a solvent for synthesis and analysis throughout the experiment. Elemental analysis for C, H, and N was performed using a Vario-ELIII elemental analyzer. Metal analyses were determined by complexometric titration using an EDTA (0.01 M) solution. The Fourier-Transform Infrared (FT-IR) spectra were recorded on a JASCO 4100 spectrophotometer on KBr pellets in the range of 4000-400 cm<sup>-1</sup>. Electronic

absorption spectra were measured on a JASCO V-630 UV-vis spectrophotometer. The luminescence spectra were recorded with a Perkin-Elmer LS-55 spectrophotometer, with whole excitation and emission slit widths of 10 and 5 nm, respectively. Simultaneous TG-DTA studies were undertaken on a Perkin – Elmer SII thermal analyzer, and curves were obtained in air using platinum cups as holders with ~ 3 mg of each sample at a heating rate of 10 °C/min. Inductively coupled plasma atomic emission spectroscopy (ICPAES) was performed on a Perkin Elmer Optima 5300 DV spectrometer. The powder X-ray diffraction (PXRD) patterns were recorded using a Bruker D8 PHASER powder diffraction instrument with K $\alpha$  radiation of the Cu target as the light source ( $\lambda = 1.54056 \text{ \AA}$ ) and a silicon plate as the sample stage (holder). For the PXRD measurements, a continuous step-scan mode with a step width of 0.030°, an equilibrium time of 256 seconds per step, and operating conditions of 30 kV & 10 mA were used.

The intensities for the X-ray determination of compounds were collected with Mo K $\alpha$  radiation ( $\lambda = 0.71073 \text{ \AA}$ ) from a Bruker D8 Quest diffractometer equipped with a TRIUMPH monochromator and a CMOS detector. The crystal was kept at 300.0 K during data collection. Using Olex2,<sup>[1]</sup> the structure was solved with the ShelXT<sup>[2]</sup> structure solution program using intrinsic phasing and was refined with the ShelXL<sup>[3]</sup> refinement package using least squares minimization.

The particle sizes and morphologies of the synthesized nanoparticles were determined by field emission scanning electron microscopy (FESEM) and energy dispersive spectrometry (EDS) on a JEOS JSM-6510. High-resolution transmission electron microscopy (HR-TEM) was carried out using a JEOL JEM 2100 instrument at an operating voltage 200 kV, using a carbon-coated copper grid. Meanwhile, selected area electron diffraction (SAED) was conducted to identify the crystallinity. XPS spectra were recorded by Kratos Axis-Ultra DLD, Kratos Analytical Ltd, Japan.

## References

- [1] O. V. Dolomanov, L. J. Bourhis, R. J. Gildea, J. A. K. Howard, H. Puschmann, *J. Appl. Cryst.* **2009**, *42*, 339.
- [2] G. M. Sheldrick, *ActaCryst. A* **2015**, *71*, 3.
- [3] G. M. Sheldrick, *ActaCryst. C* **2015**, *71*, 3.
